# Supplementary material for: Analysis of interaction between the apicomplexan protozoan Toxoplasma gondii and host cells using label-free Raman spectroscopy
Source: Royal Society of Chemistry journal article supplement (doi:10.1039/c4an01810a), 2014-11-19
Supplement: c4an01810a1.pdf [file c4an01810a1.pdf]

## SUPPLEMENTARY INFORMATION

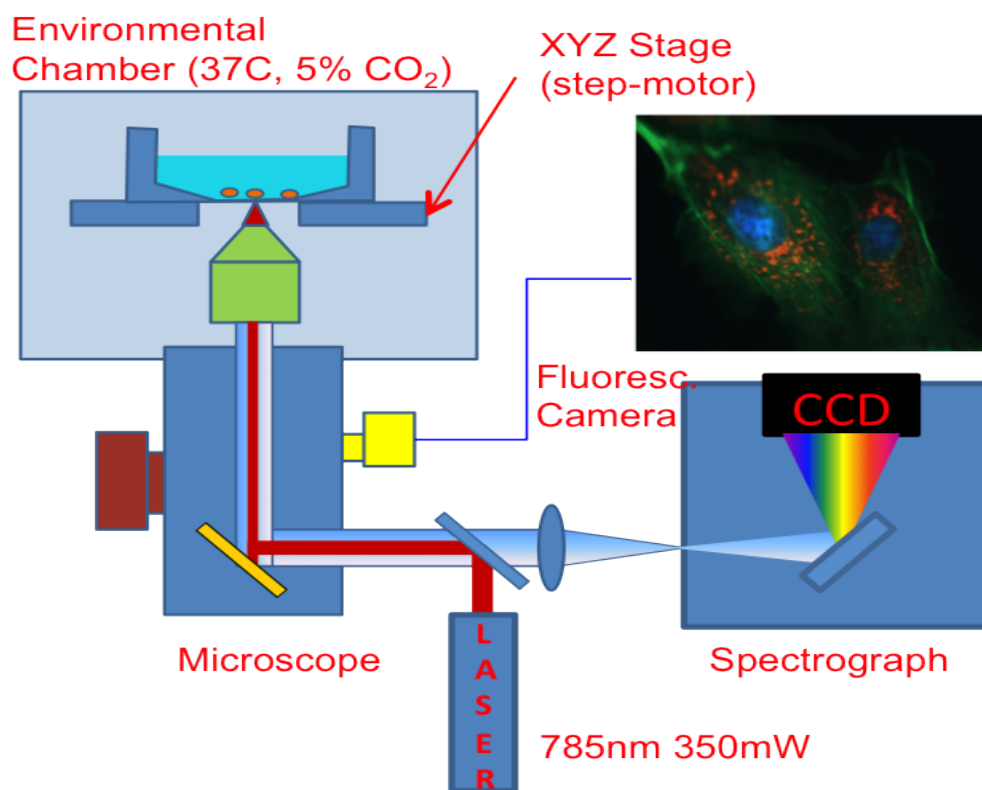

**Figure S1:** Schematic description of the Raman micro-spectrometer for molecular analysis of live cells.
